# Supplementary material for: Elastic shape recovery of carbon nanotube sponges in liquid oil
Source: Royal Society of Chemistry journal article supplement (doi:10.1039/c2jm33686c), 2012-01-01
Supplement: c2jm33686c.pdf [file c2jm33686c.pdf]

**Supporting Information:**

**Elastic Shape Recovery of Carbon Nanotube Sponges in Liquid Oil**

Xuchun Gui<sup>a‡</sup>, Zhiping Zeng<sup>a‡</sup>, Anyuan Cao<sup>b\*</sup>, Zhiqiang Lin<sup>a</sup>, Haiqiang Zeng<sup>a</sup>, Rong Xiang<sup>a</sup>,

Tianzhun Wu<sup>a</sup>, Yuan Zhu<sup>a</sup>, Zikang Tang<sup>a\*</sup>

<sup>a</sup> *State Key Lab of Optoelectronic Materials and Technologies, School of Physics and Engineering, Sun Yat-sen University, Guangzhou, 510275, P. R. China*

<sup>b</sup> *Department of Materials Science and Engineering, College of Engineering, Peking University, Beijing 100871, P. R. China*

**Content:**

Figure S1. Cycle compression in ethanol, vegetable oil, mineral oil.

Figure S2. Cycle compression at different compressive velocity in vegetable oil, ethanol and mineral oil.

Figure S3. Deformation history featuring of sponge in air.

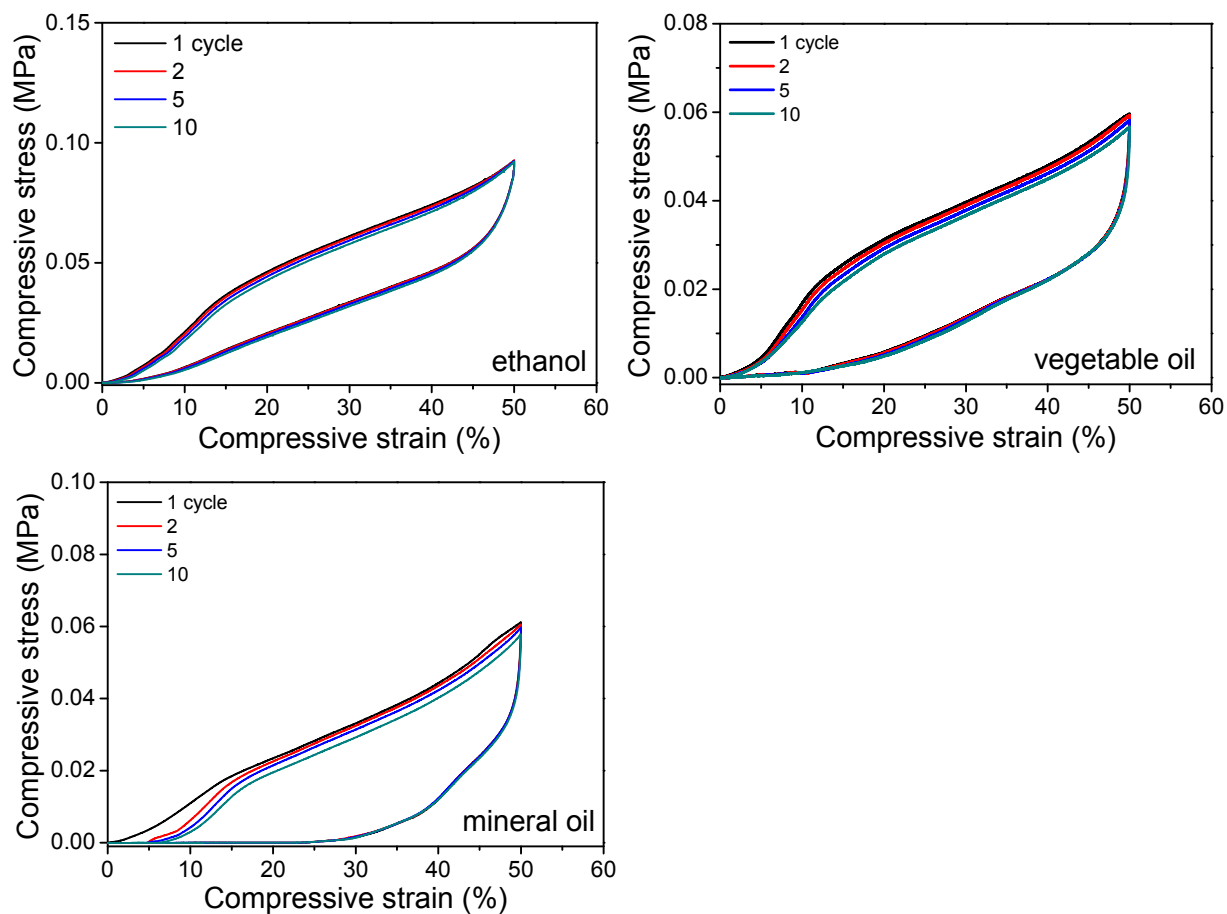

**Figure S1. Cycle compression in ethanol, vegetable oil, mineral oil, respectively.**

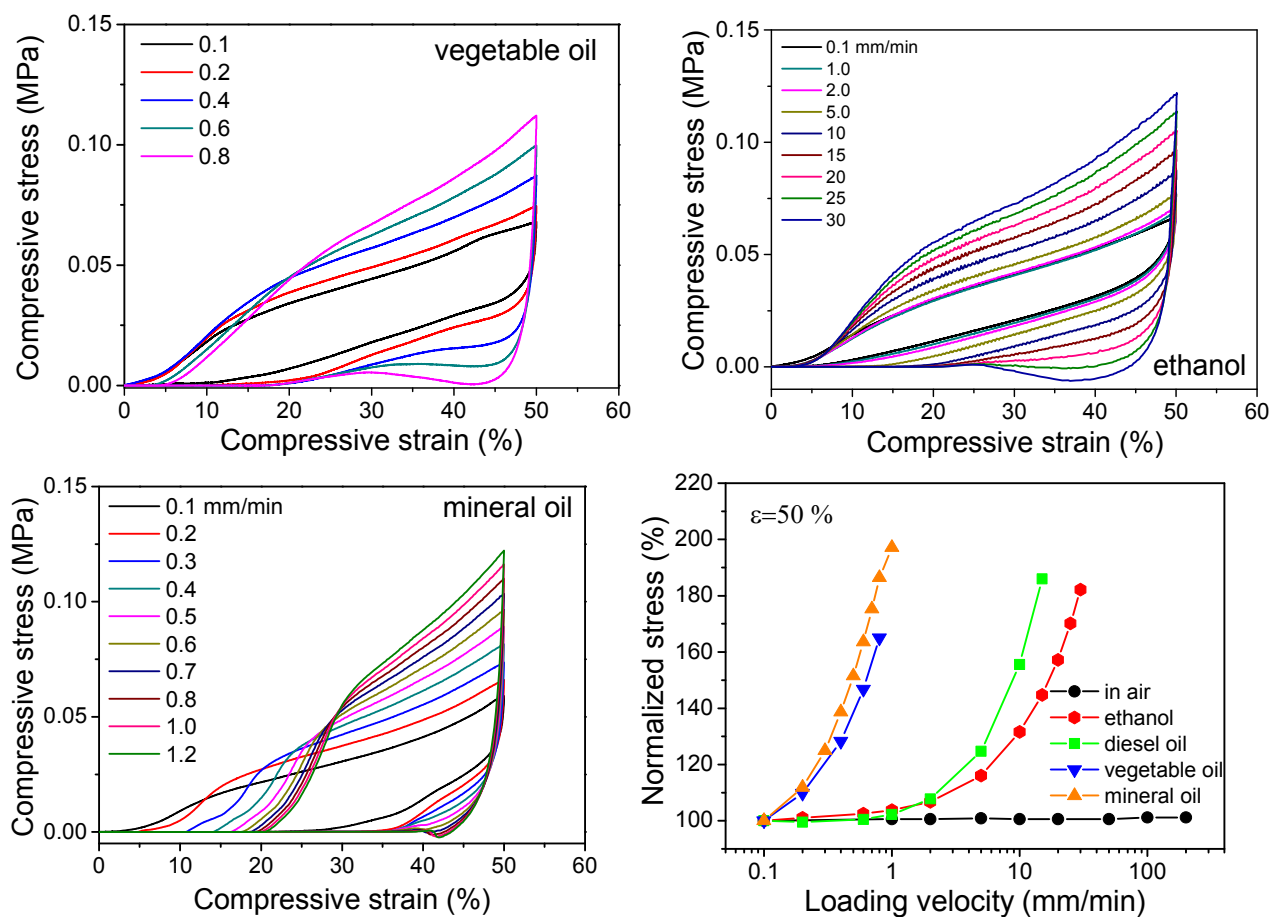

**Figure S2. Cycle compression at different compressive velocity in vegetable oil, ethanol and mineral oil respectively, and the normalized stress.**

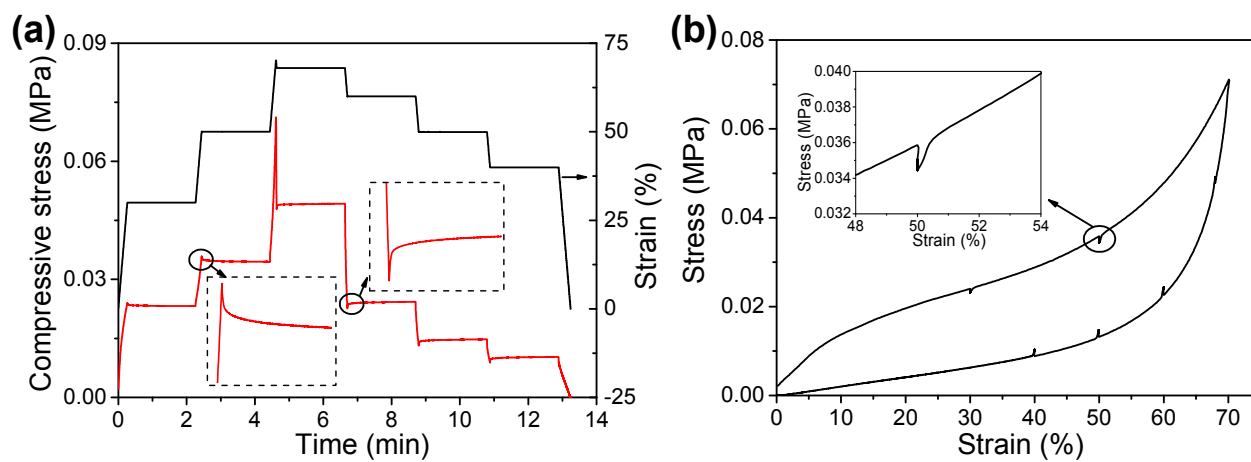

**Figure S3. Deformation history featuring of sponge in air. (a) Stage compression of the sponges. (b) corresponding stress-strain curve**
